# Supplementary material for: Molecular characterization of a soybean FT homologue, GmFT7
Source: PubMed Central journal article supplement (PMC7878754; doi:10.1038/s41598-021-83305-x), 2021-02-11
Supplement: 41598_2021_83305_MOESM1_ESM.pdf [file 41598_2021_83305_MOESM1_ESM.pdf]

Supplementary Information

**Molecular characterization of a soybean *FT* homologue, *GmFT7***

Senhao Zhang<sup>1</sup>, Mohan B. Singh<sup>1</sup> and Prem L. Bhalla<sup>1\*</sup>

1. Plant Molecular Biology and Biotechnology Laboratory, School of Agriculture and Food, Faculty of Veterinary and Agricultural Sciences, The University of Melbourne, Parkville, Victoria 3010, Australia.

\*Corresponding author: Prem L. Bhalla ([premlb@unimelb.edu.au](mailto:premlb@unimelb.edu.au))

```

GmFT7          1  ----- 0
GsFT2c        1  MPSGSRDPLVVGRVIGDVLDPFECSIPMRVSYNNRDVSNNGCEFQPSQVVN 50
GmFT7          1  ----- 0
GsFT2c        51  QPRINIGDDLRFYTLIAVDPDAPSPSDPNLREYLHVLVTDIPATTGPS 100
GmFT7          1  -----MMGIHRLVFVLFRLGRETQVYAPGWRQNFNTREFAEL 37
GsFT2c        101  FGHEVVITYESPRPMMGIHRLVFVLFRLGRETQVYAPGWRQNFNTREFAEL 150
GmFT7          38  YNLGLPVAAVYFNIQRESGSGGRRLYH 64
GsFT2c        151  YNLGLPVAAVYFNIQRESGSGGRRLYH 177

```

**Supplementary Figure 1. Pairwise protein sequence alignment of GmFT7 and GsFT2c.**

Protein sequences of soybean (*Glycine max*) GmFT7 (Glyma02g07650) and wild soybean (*Glycine soja*) GsFT2c (XP\_028198760) were retrieved from Phytozome (v12; <https://phytozome.jgi.doe.gov/pz/portal.html#>) and NCBI, respectively. Pairwise protein sequence alignment was performed using Needle ([https://www.ebi.ac.uk/Tools/psa/emboss\\_needle/](https://www.ebi.ac.uk/Tools/psa/emboss_needle/)) with default parameters.

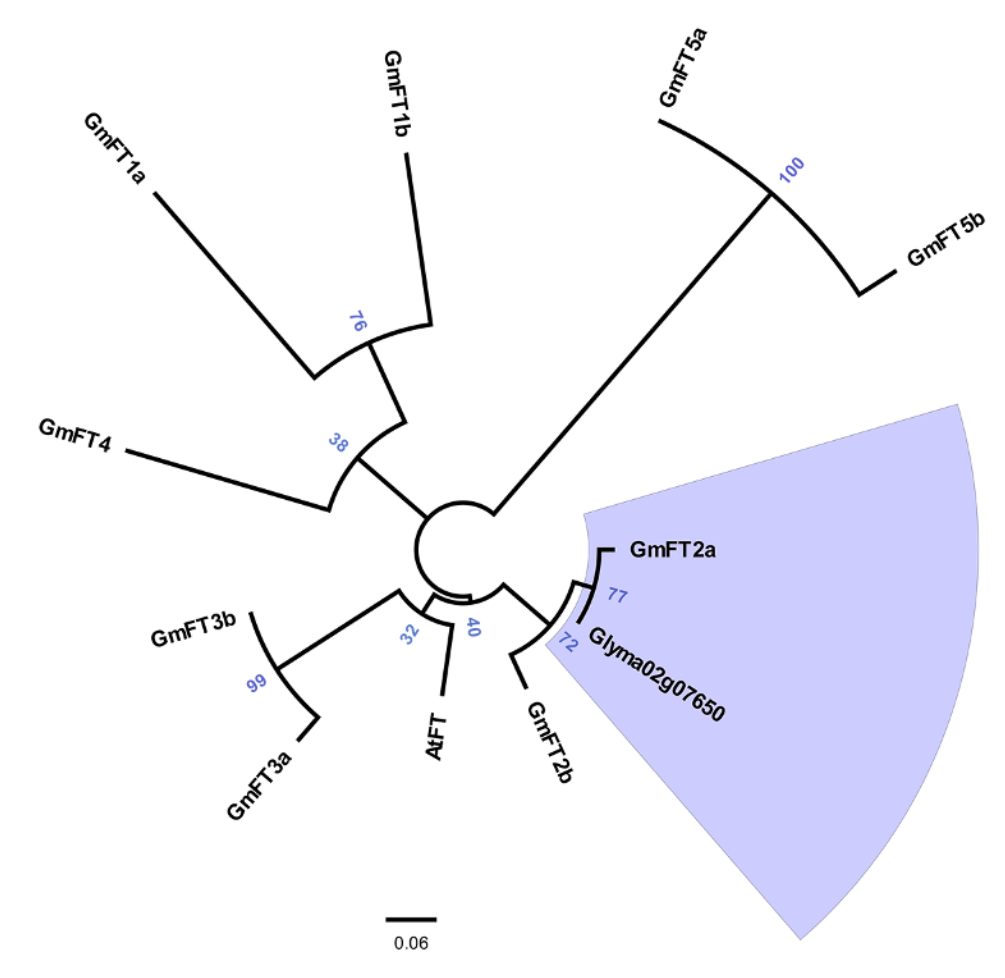

**Supplementary Figure 2. Phylogenetic tree of FT homologues.**

Protein sequences of ten GmFT homologues and Arabidopsis FT were retrieved from Phytozome (v12; <https://phytozome.jgi.doe.gov/pz/portal.html#>). Maximum Likelihood tree was constructed using MEGA7.

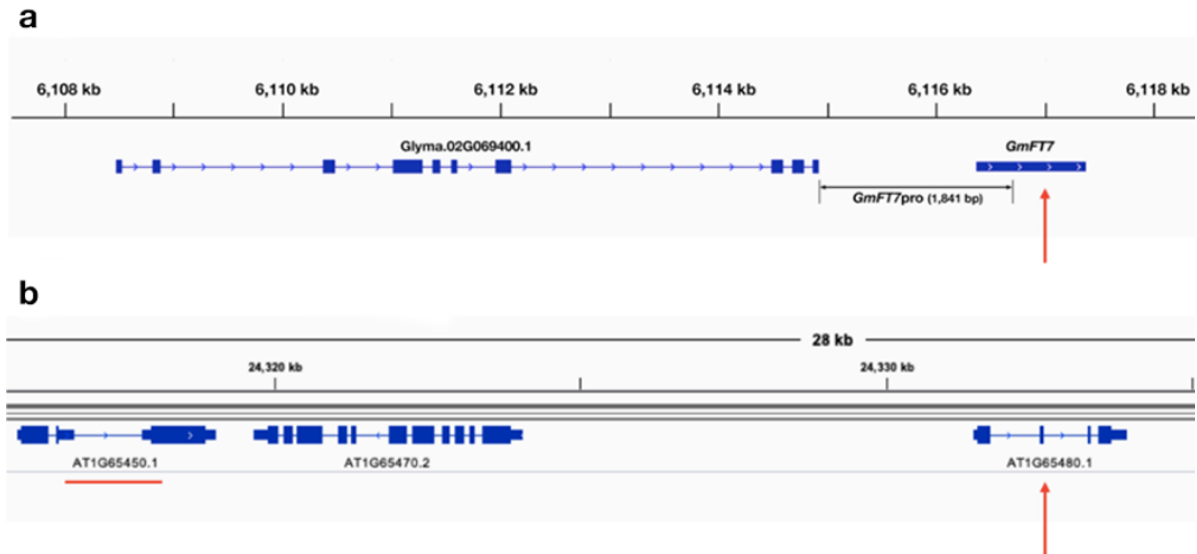

**Supplementary Figure 3. Locations showing distances with the upstream genes of soybean *GmFT7* (a) and Arabidopsis *FT* (b) on their corresponding chromosomes.**

1.8 kb promoter for *GmFT7* was chosen because there is another gene (*Glyma.02G069400.1*) located upstream of *GmFT7* (a). From the end of *Glyma.02G069400.1* to the ATG of *GmFT7*, the length is 1841 bp. Hence, the promoter of *GmFT7* was cloned as 1841 bp. On the other hand, Arabidopsis, *AtFT* (*AT1G65480*, + strand) is located downstream of gene *AT1G65450* (+strand). The distance between *AtFT* and its closest upstream gene *AT1G65450* is more than 10 kb (b). Locations on chromosomes were displayed using Integrative Genomics Viewer (IGV) (<http://software.broadinstitute.org/software/igv/home>).

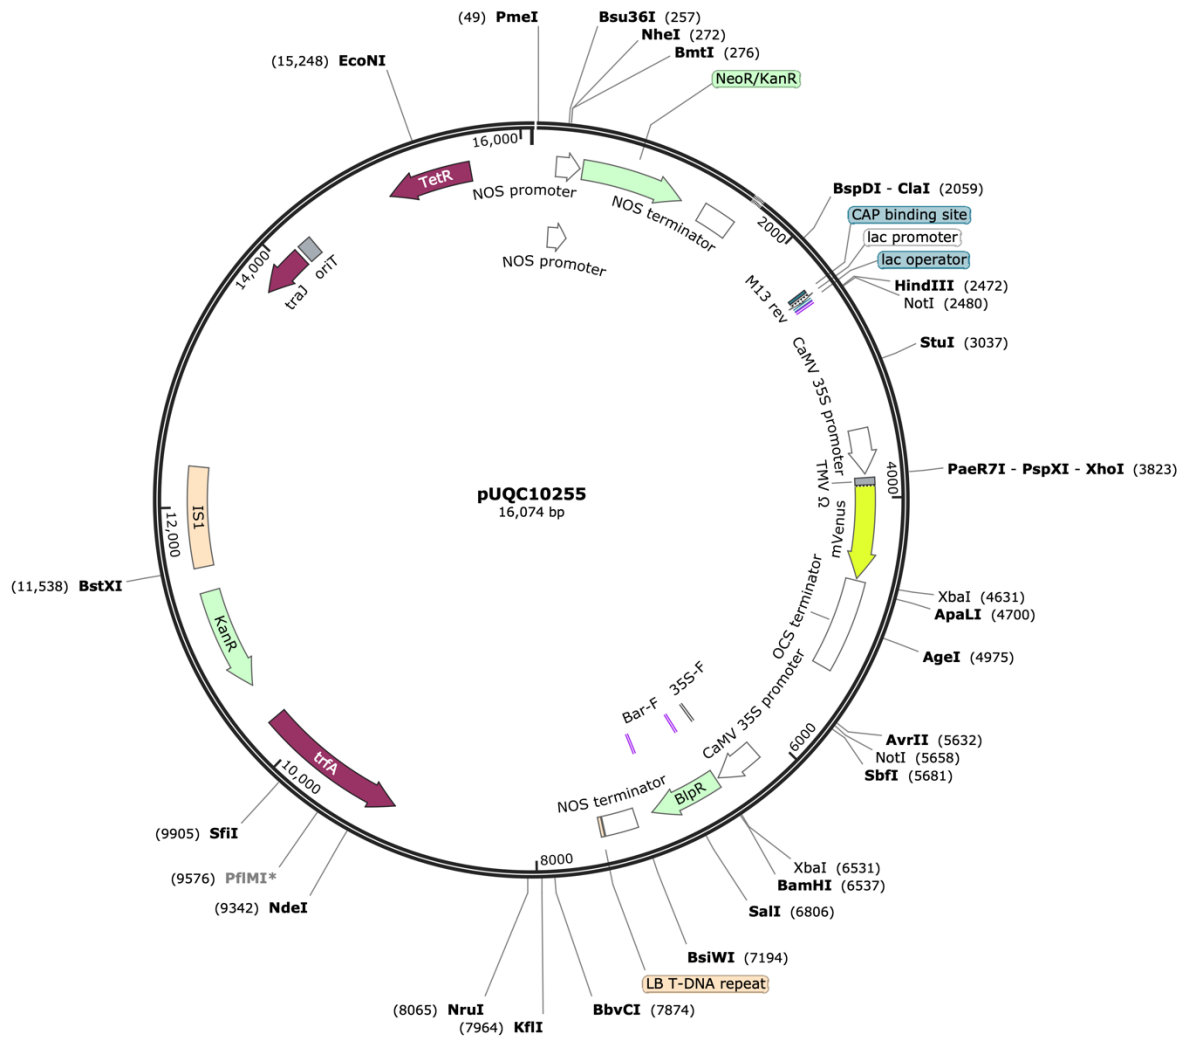

**Supplementary Figure 4. Map of the expression vector pUQC10255 used in this study.**

The map of the expression vector pUQC10255 is displayed using SnapGene Viewer 5.2.3 (<https://www.snapgene.com/snapgene-viewer/>). Main features of pUQC10255 are labelled accordingly.

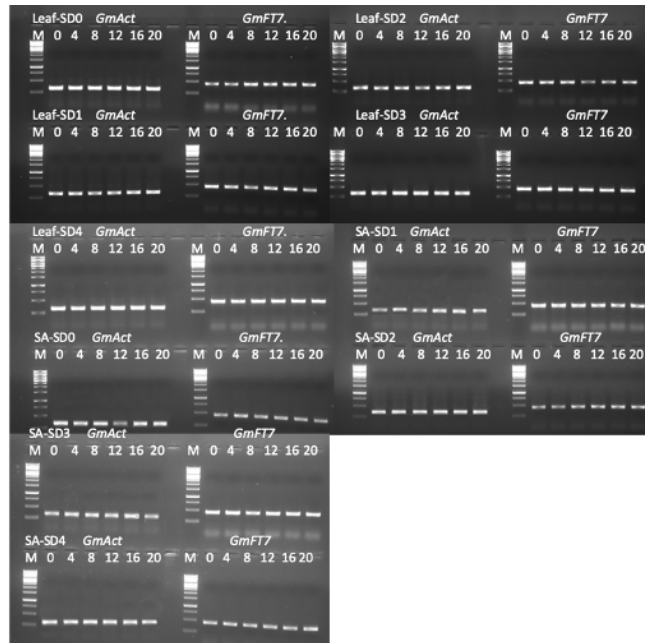

**Supplementary Figure 5. Original gel electrophoresis pictures for Fig. 5.**

M, GeneRuler 1kb DNA Ladder (Thermo Fisher, Cat. Number: SM0311). SA, shoot apex. SD, short day. *GmAct*, soybean reference gene *Actin*.

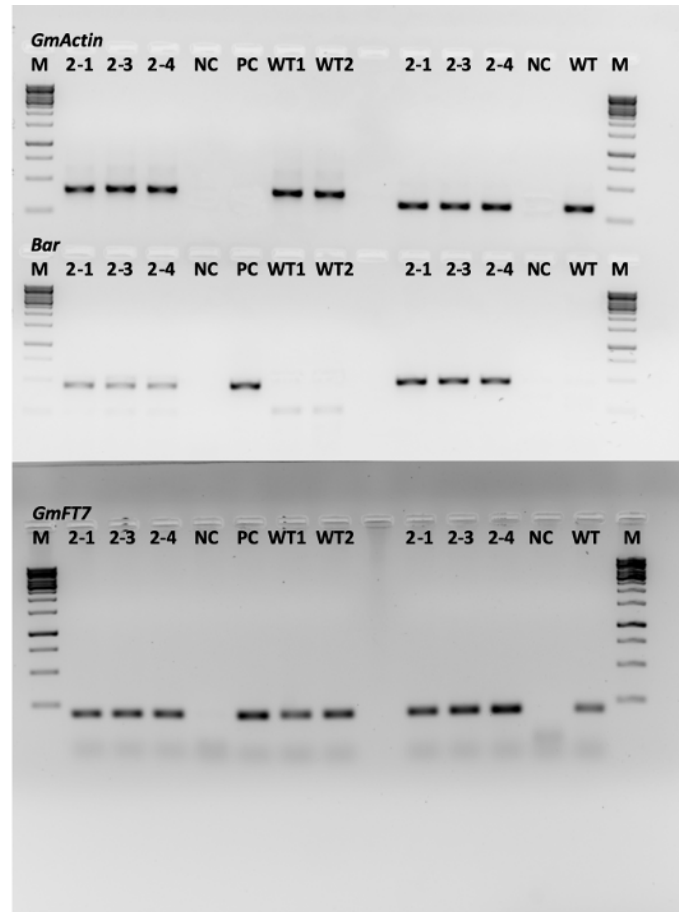

**Supplementary Figure 6. Genomic PCR (a) and RT-PCR (b) to confirm transgenic status of soybean plants.**

This is the original gel picture for Fig. 8a/b in the main manuscript. Transgenic soybean plants over-expressing *GmFT7* in soybean cv. Bragg were used. Genomic PCR (upper panel) confirmed the presence of *Bar* gene while RT-PCR (lower panel) analysis showed the expression of the *Bar* and *GmFT7* transcripts. Soybean reference gene *GmActin*, herbicide resistance *Bar* gene, and *GmFT7* CDS region. 2-1, 2-3 and 2-4, three individual T2 transgenic soybean plants. WT1, WT2 and WT, wild type soybean plants. NC, negative control (water was used as template for PCR). PC, plasmid control (*35S:GmFT7:polyA* cassette in vector pUQC10255) as a positive control. M, GeneRuler 1kb DNA Ladder (Thermo Fisher, Cat. Number: SM0311).

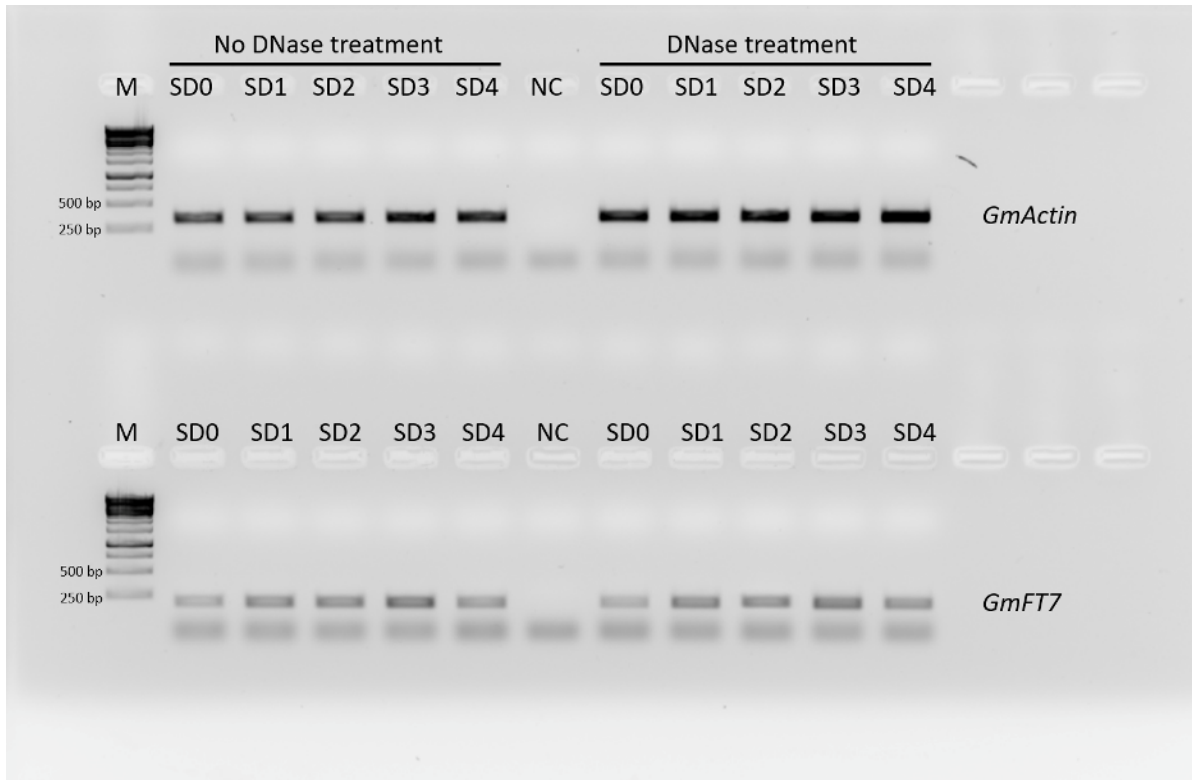

**Supplementary Figure 7. Expression of *GmFT7* using PCR.**

Total RNA was extracted using TRIzol and followed by “without DNase treatment” to compare the PCR results with previous PCR experiments we performed. M, GeneRuler 1kb DNA ladder (Thermo Fisher); SD0-SD4, 0 to 4-SD treatment. *GmActin*, reference gene for PCR. NC, negative control. DNase treatment, total RNA was treated using DNase to remove potential genomic DNA contamination (previous RT-PCR on *GmFT7* we performed); No DNase treatment, total RNA was not treated with DNase for potential genomic DNA removal.



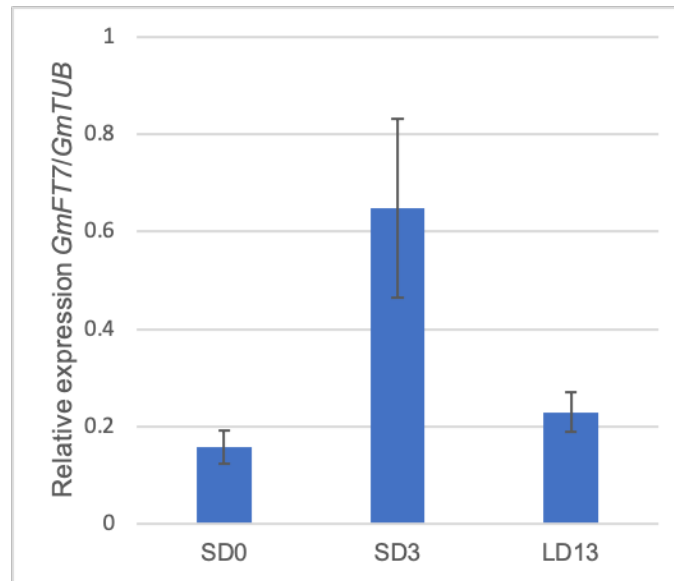

**Supplementary Figure 8. Relative expression of *GmFT7* under SD0, SD3 and LD13.**

qPCR was performed to check *GmFT7* expression on SD3 and LD13. Bar chart was shown as mean and standard deviation with three replicates. *GmTUB* was used as a reference gene for normalization. Student's T-test was performed in R (<https://www.r-project.org/>) and it showed that the expression of *GmFT7* was higher under SD3 compared to LD13, however the difference was not significant ( $p$ -value = 0.2142). While expression of *GmFT7* was significantly ( $p < 0.05$ ) higher under SD3 compared to SD0.

**Supplementary Table 1.** Primers used in this study.

| Name                                                                                                             | Sequence (5' -> 3')             | Length (nt) | Note                                                        |
|------------------------------------------------------------------------------------------------------------------|---------------------------------|-------------|-------------------------------------------------------------|
| GmFT7mRNA-F                                                                                                      | CCGTCGTAAAAAGCACTTAATAACCG      | 26          | <i>GmFT7</i> full-length mRNA                               |
| GmFT7mRNA-R                                                                                                      | CCCCATAATTTAACTTGTGCTCAAG       | 25          |                                                             |
| FT7-cloF                                                                                                         | AATGCTCGAGATGATGGGGATTCATCGTTTA | 31          | Cloning of <i>GmFT7</i> CDS                                 |
| FT7-cloR                                                                                                         | CGCGGATCCTCAATGGTATAACCTTCTTC   | 29          |                                                             |
| GmFT7-1F                                                                                                         | ATGATGGGATTCATCGTTAGTG          | 24          | Amplification of <i>GmFT7</i> CDS;<br>qPCR for <i>GmFT7</i> |
| GmFT7-1R                                                                                                         | TCAATGGTATAACCTTCTCCACC         | 24          |                                                             |
| GmActin-F                                                                                                        | ATCATGTTTGAGACCTCAATGTG         | 24          | Reference gene <i>GmActin</i>                               |
| GmActin-F                                                                                                        | CTCGAGTCTTGCTCATAATCTAGG        | 25          |                                                             |
| BAR-1F                                                                                                           | GTACCGGCAGGCTGAAGTCC            | 20          | <i>Bar</i> gene                                             |
| BAR-1R                                                                                                           | CGGTCTGCACCATCGTCAAC            | 20          |                                                             |
| AT4G34270-F                                                                                                      | GTGAAAAGTGTGGAGAGAAGCAA         | 24          | qPCR reference gene for<br>Arabidopsis                      |
| AT4G34270-R                                                                                                      | TCAACTGGATACCCTTTCGCA           | 21          |                                                             |
| GmTUB-q-F                                                                                                        | GAGAAGAGTATCCGGATAGG            | 20          | qPCR reference gene for<br>Soybean                          |
| GmTUB-q-R                                                                                                        | GAGCTTGAGTGTTCGGAAAC            | 20          |                                                             |
| GmFT2a-q-F                                                                                                       | GGATTGCCAGTTGCTGCTGT            | 20          | qPCR                                                        |
| GmFT2a-q-R                                                                                                       | GAGTGTGGGAGATTGCCAAT            | 20          |                                                             |
| GmFT5a-q-F                                                                                                       | GCCTTACTCCAGCTTATACT            | 20          | qPCR                                                        |
| GmFT5a-q-R                                                                                                       | GGCATGCTCTAGCATTGCAA            | 20          |                                                             |
| GmAP1-q-F                                                                                                        | TGAACATGGGTGGCAATTAC            | 20          | qPCR                                                        |
| GmAP1-q-R                                                                                                        | TGTCAAATGCCATACCAAAG            | 20          |                                                             |
| GmSOC1b-q-F                                                                                                      | AAGAAGCCCAACTGCAATGT            | 20          | qPCR                                                        |
| GmSOC1b-q-R                                                                                                      | GGGCTTCAGAAATGAGGAAAGG          | 22          |                                                             |
| GmLFY2-q-F                                                                                                       | TGACGAAGGAAACATTAACACTGG        | 24          | qPCR                                                        |
| GmLFY2-q-R                                                                                                       | GCCTGAACCTGCATCAAGAA            | 20          |                                                             |
|                                                                                                                  |                                 |             |                                                             |
| <b>Note:</b>                                                                                                     |                                 |             |                                                             |
| Primers for <i>GmFT7</i> mRNA in Fig. 5 were GmFT7-1F/GmFT7mRNA-R.                                               |                                 |             |                                                             |
| Primers for <i>GmFT7</i> in genomic PCR and RT-PCR (Fig. 8) were GmFT7-1F/ GmFT7-1R to amplify <i>GmFT7</i> CDS. |                                 |             |                                                             |
